# Supplementary material for: An aqueous olive leaf extract (OLE) ameliorates parameters of oxidative stress associated with lipid accumulation and induces lipophagy in human hepatic cells
Source: Royal Society of Chemistry journal article supplement (doi:10.1039/d3fo00817g), 2023-01-01
Supplement: d3fo00817g2.pdf [file d3fo00817g2.pdf]

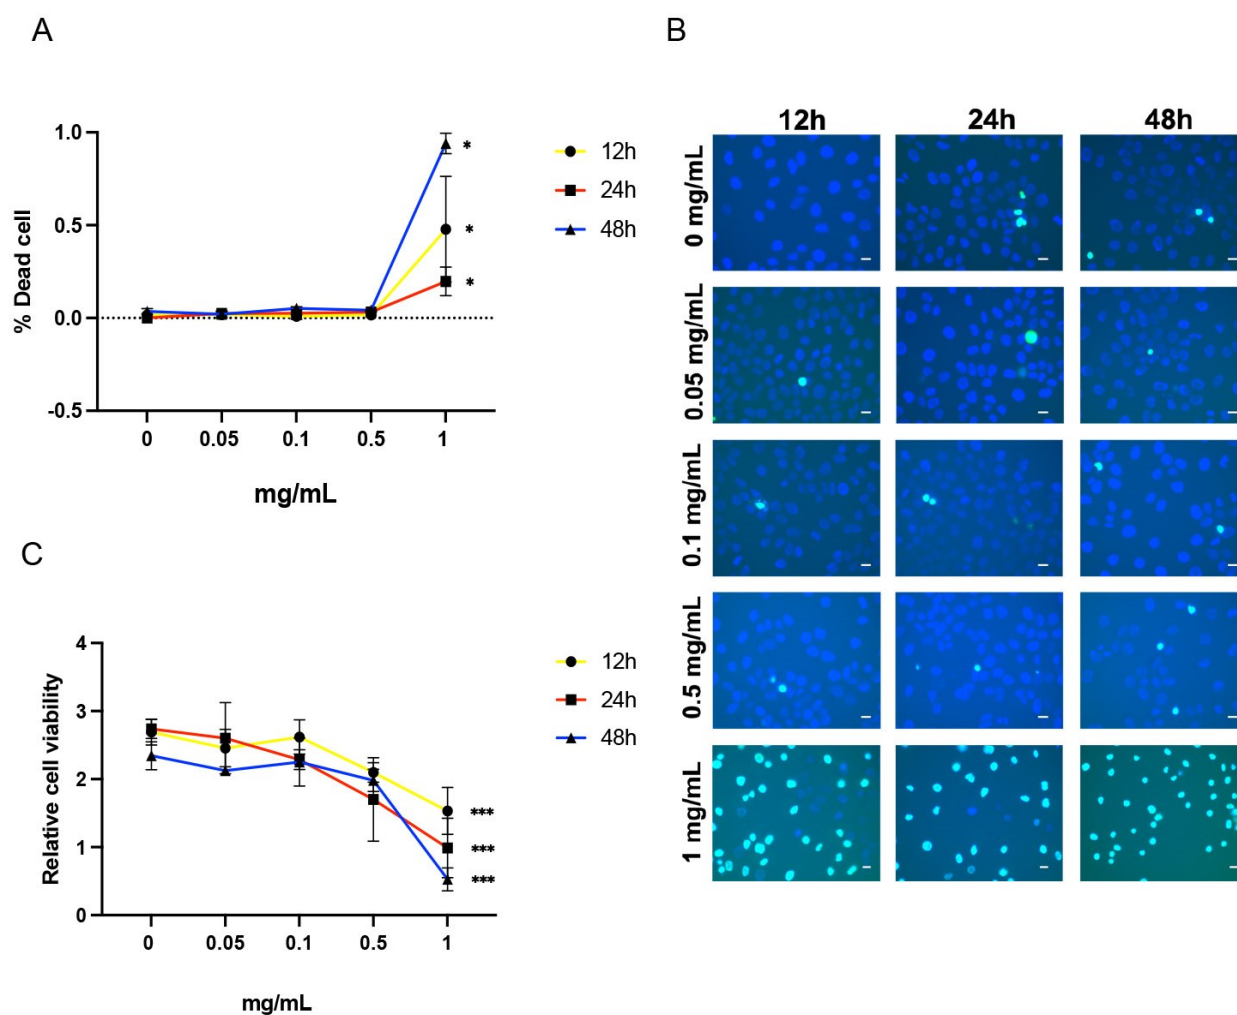

**Figure 1S. OLE activity in HuH7 cells.** (A-B) HuH7 cells were incubated with OLE at the indicated concentrations and time points. After exposure, cells were stained at room temperature with stable NucBlue® Live reagent and NucGreen® Dead reagent (ReadyProbes™ Cell Viability Imaging Kit, ThermoFisher #R37609). After 15 minutes, viability was determined by counting total vs dead cells (treatment vs. control: \*  $p < 0.05$ ). Merged images show live cells in blue and dead cells in green. Scale bar 10  $\mu\text{m}$  (40 x magnification). Images were captured with Zeiss LSM700 confocal laser scanning microscope (Zeiss, Oberkochen, Germany) equipped with a 63 $\times$ /1.40 NA oil immersion objective. (C) Cell proliferation was measured by the Sulforhodamine B colorimetric assay SRB assay. The results were expressed as the mean absorbance value (570 nm). Data are presented as means  $\pm$  SD of three determinations (treatment vs. control: \*\*\*  $p < 0.001$ ).
