# Supplementary material for: An aqueous olive leaf extract (OLE) ameliorates parameters of oxidative stress associated with lipid accumulation and induces lipophagy in human hepatic cells
Source: Royal Society of Chemistry journal article supplement (doi:10.1039/d3fo00817g), 2023-01-01
Supplement: d3fo00817g3.pdf [file d3fo00817g3.pdf]

**Table 1S.** Oleuropein hydrolysis in HuH7 cell cultures

| Time (h) | Oleuropein    | Elenolic acid glucoside<br>[M-H] <sup>-</sup> = 403.1 |
|----------|---------------|-------------------------------------------------------|
| (mg/mL)  |               |                                                       |
| 0        | 0.096 ± 0.009 | 0.000 ± 0.0001                                        |
| 4        | 0.066 ± 0.004 | 0.001 ± 0.0003                                        |
| 24       | 0.040 ± 0.007 | 0.0018 ± 0.0002                                       |
| 48       | 0.009 ± 0.002 | 0.034 ± 0.0003                                        |

HuH7 cells were incubated with medium containing OLE at a concentration of 0.1 mg/mL. After the indicated times samples of the culture supernatant was taken and oleuropein was quantified by UHPLC-ESI-MS/MS. Values are mean ± SD of two different experiments performed in triplicate.
